# Supplementary material for: Vitamin D status and its correlates in Saudi male population
Source: Springer Nature journal article supplement (doi:10.1186/s12889-019-6527-5), 2019-02-20
Supplement: MOESM1 [file 16495168]

## Vitamin D distribution among Saudi Men

### Questionnaire

Hospital number: .....

Age: .....Year

Are you a smoker  Yes  No

Do you have a prostate problem  Yes  No

If Yes, please verify

Are you getting vitamin D supplementation  Yes  No

If Yes, for how long: .....

#### Exposure to sunlight:

- Daily
- 3-4 times weekly
- 1-2 times weekly
- Rarely

#### Time outside home exposed to sunlight

- Less than one hour
- 1-2 hours

#### Are you suffering from?

Diabetes mellitus  Yes  No

Hypertension  Yes  No

Hypercholesterolemia  Yes  No

Heart diseases  Yes  No

#### Anthropometric measurements:

Weight: .....Kg

Height: .....CM

#### Biochemical results:

Blood sugar level: ..... mmol/L

Cholesterol: ..... mmol/L

25-hydroxyvitamin D: .....nmol/L
